# Supplementary material for: The Relation of Calculated Plasma Volume Status to Sublingual Microcirculatory Blood Flow and Organ Injury
Source: MDPI journal article supplement (doi:10.3390/jpm13071085), 2023-06-30
Supplement: s1 [file s1]

**Table S3: Correlations of postoperative calculated PVS with clinical and laboratory variables**

|                        | Spearman's rho | Adjusted p-value |
|------------------------|----------------|------------------|
| Age                    | 0.270          | <b>0.027</b>     |
| Weight                 | -0.520         | <b>&lt;0.001</b> |
| Height                 | 0.004          | 0.996            |
| BMI                    | -0.554         | <b>&lt;0.001</b> |
| Modified Frailty Index | 0.069          | 0.642            |
| POSSUM (morbidity)     | 0.347          | <b>0.004</b>     |
| POSSUM (mortality)     | 0.340          | <b>0.004</b>     |
| ACS_NSQIP              | 0.230          | 0.063            |
| APACHE II              | 0.104          | 0.472            |
| SOFA                   | 0.001          | 0.996            |
| WBC                    | -0.137         | 0.347            |
| Lymphocytes            | -0.258         | 0.034            |
| Monocytes              | 0.078          | 0.625            |
| Neutrophils            | -0.077         | 0.625            |
| Eosinophils            | -0.015         | 0.979            |
| Basophils              | -0.141         | 0.342            |
| RBC                    | -0.318         | <b>0.008</b>     |
| HGB                    | -0.745         | <b>&lt;0.001</b> |
| HCT                    | -0.813         | <b>&lt;0.001</b> |
| MCV                    | -0.314         | <b>0.008</b>     |
| MCH                    | -0.168         | 0.210            |
| MCHC                   | -0.024         | 0.961            |
| RDW                    | 0.178          | 0.182            |
| PLT                    | -0.206         | 0.101            |
| PT                     | -0.006         | 0.996            |
| INR                    | 0.047          | 0.813            |
| APTT                   | 0.258          | <b>0.034</b>     |
| Glucose                | -0.123         | 0.408            |
| Urea                   | -0.116         | 0.418            |
| Creatinine             | -0.014         | 0.979            |
| CRP                    | 0.246          | <b>0.046</b>     |
| SGOT                   | 0.072          | 0.642            |
| SGPT                   | 0.001          | 0.996            |

|                      | Spearman's rho | Adjusted p-value |
|----------------------|----------------|------------------|
| γGT                  | -0.033         | 0.921            |
| Total bilirubin      | 0.070          | 0.642            |
| Direct bilirubin     | 0.109          | 0.451            |
| CPK                  | -0.002         | 0.996            |
| LDH                  | -0.120         | 0.408            |
| Total protein        | -0.321         | <b>0.008</b>     |
| Albumin              | -0.294         | <b>0.014</b>     |
| Alkaline phosphatase | -0.240         | 0.051            |
| Amylase              | -0.028         | 0.939            |
| Calcium              | 0.119          | 0.408            |
| Potassium            | -0.272         | <b>0.027</b>     |
| Sodium               | -0.136         | 0.347            |
