# Supplementary material for: The Relation of Calculated Plasma Volume Status to Sublingual Microcirculatory Blood Flow and Organ Injury
Source: MDPI journal article supplement (doi:10.3390/jpm13071085), 2023-06-30
Supplement: s1 [file s1]

**Table S2: Correlations of preoperative calculated PVS with clinical and laboratory variables**

|                        | <b>Spearman's rho</b> | <b>Adjusted p-value</b> |
|------------------------|-----------------------|-------------------------|
| Age                    | 0.091                 | 0.609                   |
| Weight                 | -0.560                | <b>&lt;0.001</b>        |
| Height                 | -0.159                | 0.276                   |
| BMI                    | -0.508                | <b>&lt;0.001</b>        |
| Modified Frailty Index | -0.033                | 0.823                   |
| POSSUM (morbidity)     | 0.422                 | <b>&lt;0.001</b>        |
| POSSUM (mortality)     | 0.418                 | <b>&lt;0.001</b>        |
| ACS_NSQIP              | 0.108                 | 0.521                   |
| APACHE II              | 0.001                 | 0.994                   |
| SOFA                   | -0.098                | 0.565                   |
| WBC                    | -0.089                | 0.609                   |
| Lymphocytes            | -0.281                | <b>0.023</b>            |
| Monocytes              | 0.046                 | 0.796                   |
| Neutrophils            | -0.016                | 0.890                   |
| Eosinophils            | -0.044                | 0.796                   |
| Basophils              | -0.112                | 0.507                   |
| RBC                    | -0.504                | <b>&lt;0.001</b>        |
| HGB                    | -0.838                | <b>&lt;0.001</b>        |
| HCT                    | -0.859                | <b>&lt;0.001</b>        |
| MCV                    | -0.102                | 0.551                   |
| MCH                    | -0.086                | 0.609                   |
| MCHC                   | -0.154                | 0.279                   |
| RDW                    | 0.225                 | 0.085                   |
| PLT                    | 0.083                 | 0.609                   |
| PT                     | 0.332                 | <b>0.004</b>            |
| INR                    | 0.333                 | <b>0.004</b>            |
| APTT                   | 0.230                 | 0.085                   |
| Glucose                | 0.024                 | 0.861                   |
| Urea                   | 0.049                 | 0.796                   |
| Creatinine             | -0.048                | 0.796                   |
| CRP                    | 0.191                 | 0.166                   |
| SGOT                   | 0.129                 | 0.413                   |
| SGPT                   | -0.042                | 0.796                   |
| γGT                    | 0.156                 | 0.279                   |
| Total bilirubin        | -0.083                | 0.609                   |
| Direct bilirubin       | -0.058                | 0.758                   |

|                      | Spearman's rho | Adjusted p-value |
|----------------------|----------------|------------------|
| CPK                  | -0.036         | 0.813            |
| LDH                  | 0.040          | 0.797            |
| Total protein        | -0.223         | 0.085            |
| Albumin              | -0.226         | 0.085            |
| Alkaline phosphatase | 0.068          | 0.697            |
| Amylase              | 0.017          | 0.890            |
| Calcium              | 0.132          | 0.401            |
| Potassium            | -0.119         | 0.464            |
| Sodium               | -0.057         | 0.758            |
