# Supplementary material for: The Relation of Calculated Plasma Volume Status to Sublingual Microcirculatory Blood Flow and Organ Injury
Source: MDPI journal article supplement (doi:10.3390/jpm13071085), 2023-06-30
Supplement: s1 [file s1]

**Table S1: Baseline general blood count and biochemistry**

|                      | Females               | Males                 |
|----------------------|-----------------------|-----------------------|
| WBC                  | 7150 (5900 – 8650)    | 7400 (6300 – 8600)    |
| Lymphocytes          | 1880 (1415 – 2072.5)  | 1635 (1400 – 2087.5)  |
| Monocytes            | 540 (400 – 625)       | 635 (495 – 740)       |
| Neutrophils          | 4390 (3830 – 5437.5)  | 4695 (4082.5 – 5870)  |
| Eosinophils          | 125 (47.5 – 200)      | 160 (90 – 310)        |
| Basophils            | 30 (27.5 – 40)        | 40 (20 – 50)          |
| RBC                  | 4.59 (4.14 – 4.82)    | 4.63 (4.39 – 4.96)    |
| HGB                  | 12.35 (11.28 – 13.5)  | 12.65 (11.8 – 14.8)   |
| HCT                  | 37.75 (35.8 – 40.88)  | 39.4 (37 – 44.7)      |
| MCV                  | 86.95 (83.8 – 90.7)   | 89.5 (82.75 – 92.2)   |
| MCH                  | 28.6 (27 – 29.42)     | 29.35 (27.17 – 30.3)  |
| MCHC                 | 32.65 (31.78 – 33)    | 32.5 (31.9 – 33.1)    |
| RDW                  | 14.2 (13.47 – 15.22)  | 14.1 (13.2 – 15.17)   |
| PLT                  | 247 (208.75 – 326)    | 249 (198.75 – 308)    |
| PT                   | 11.4 (11.07 – 12.03)  | 12.1 (11.4 – 13.35)   |
| INR                  | 0.97 (0.94 – 1.07)    | 1.03 (0.97 – 1.1)     |
| aPTT                 | 26 (23.5 – 29.77)     | 27.55 (25.37 – 30.5)  |
| Glucose              | 98.85 (92.65 – 106.6) | 99.5 (91.33 – 122.05) |
| Urea                 | 33 (23.7 – 43.55)     | 36.65 (29.15 – 43.1)  |
| Creatinine           | 0.74 (0.61 – 0.8)     | 0.85 (0.76 – 1)       |
| CRP                  | 1.2 (0.43 – 2.1)      | 0.5 (0.23 – 2.1)      |
| SGOT                 | 18.4 (13.9 – 20.7)    | 17.35 (13.7 – 25.33)  |
| SGPT                 | 17.2 (11.43 – 23.25)  | 17.2 (11.3 – 23.8)    |
| γGT                  | 14 (11 – 30)          | 15 (12 – 45.5)        |
| Total bilirubin      | 0.7 (0.4 – 0.8)       | 0.7 (0.46 – 0.84)     |
| Direct bilirubin     | 0.21 (0.1 – 0.3)      | 0.2 (0.1 – 0.39)      |
| CPK                  | 77.5 (63 – 100)       | 72 (57.5 – 112.25)    |
| LDH                  | 143 (128.25 – 187)    | 164 (133 – 199.5)     |
| Total protein        | 6.88 (6.2 – 7.34)     | 6.69 (6.1 – 7.29)     |
| Albumin              | 4.4 (4.18 – 4.49)     | 4.18 (3.87 – 4.42)    |
| Alkaline phosphatase | 61 (45 – 74.25)       | 71 (52.75 – 89)       |

|           | <b>Females</b>        | <b>Males</b>          |
|-----------|-----------------------|-----------------------|
| Amylase   | 53 (39 – 66)          | 57 (43.75 – 87)       |
| Calcium   | 8.1 (7.9 – 8.8)       | 8.1 (7.9 – 8.75)      |
| Potassium | 4.42 (4.05 – 4.8)     | 4.5 (4.24 – 4.73)     |
| Sodium    | 139.55 (138 – 140.95) | 140 (137.38 – 141.83) |
